# Supplementary material
Source: PubMed Central journal article supplement (PMC8586897)
Supplement: NIHMS1686950-supplement-Table_S1.pdf [file NIHMS1686950-supplement-Table_S1.pdf]

**Table S1A: Statistical comparison of distributions of Ucn3-negative immature, Ucn3-low and mature beta cells. Related to Figures 1 and S1.**

**Differences in distribution** lower left = approximate p-value from Kruskal-Wallis test  
 upper right = Kolmogorov-Smirnov D statistic (= largest vertical difference between two distributions)

**Figure 1J: Normalized cumulative distribution of indicated populations (3, 6 and 9 wks; 3, 8 and 14 months)**

|                        | cell number | $\alpha$ cells | immature $\beta$ cells | Ucn3 low $\beta$ cells | mature $\beta$ cells | all cells |
|------------------------|-------------|----------------|------------------------|------------------------|----------------------|-----------|
| $\alpha$ cells         | 2703        |                | 0.1591                 | 0.2105                 | 0.5813               | 0.4712    |
| immature $\beta$ cells | 279         | 0.8319         |                        | 0.1245                 | 0.561                | 0.454     |
| Ucn3 low $\beta$ cells | 341         | <0.0001        | 0.0568                 |                        | 0.4587               | 0.3495    |
| mature $\beta$ cells   | 13576       | <0.0001        | <0.0001                | <0.0001                |                      | 0.1104    |
| all cells              | 16899       | <0.0001        | <0.0001                | <0.0001                | <0.0001              |           |

**Figure S1A: Normalized cumulative distribution of indicated populations at P2**

|                        | cell number | $\alpha$ cells | immature $\beta$ cells | Ucn3 low $\beta$ cells | mature $\beta$ cells |
|------------------------|-------------|----------------|------------------------|------------------------|----------------------|
| $\alpha$ cells         | 253         |                | 0.3003                 | 0.4142                 | 0.4369               |
| immature $\beta$ cells | 64          | <0.0001        |                        | 0.1958                 | 0.2238               |
| Ucn3 low $\beta$ cells | 68          | <0.0001        | >0.9999                |                        | 0.1261               |
| mature $\beta$ cells   | 350         | <0.0001        | 0.1096                 | >0.9999                |                      |

**Figure S1B: Normalized cumulative distribution of indicated populations at P7**

|                        | cell number | $\alpha$ cells | immature $\beta$ cells | Ucn3 low $\beta$ cells | mature $\beta$ cells |
|------------------------|-------------|----------------|------------------------|------------------------|----------------------|
| $\alpha$ cells         | 440         |                | 0.3173                 | 0.3933                 | 0.431                |
| immature $\beta$ cells | 47          | 0.002          |                        | 0.131                  | 0.1998               |
| Ucn3 low $\beta$ cells | 103         | <0.0001        | >0.9999                |                        | 0.0923               |
| mature $\beta$ cells   | 1069        | <0.0001        | 0.1252                 | >0.9999                |                      |

**Figure S1C: Normalized cumulative distribution of indicated populations at 3 weeks**

|                        | cell number | $\alpha$ cells | immature $\beta$ cells | Ucn3 low $\beta$ cells | mature $\beta$ cells |
|------------------------|-------------|----------------|------------------------|------------------------|----------------------|
| $\alpha$ cells         | 799         |                | 0.2282                 | 0.2784                 | 0.5436               |
| immature $\beta$ cells | 31          | 0.8119         |                        | 0.236                  | 0.4979               |
| Ucn3 low $\beta$ cells | 63          | 0.0002         | >0.9999                |                        | 0.3594               |
| mature $\beta$ cells   | 1737        | <0.0001        | <0.0001                | <0.0001                |                      |

**Figure S1D: Normalized cumulative distribution of indicated populations at 6 weeks**

|                        | cell number | $\alpha$ cells | immature $\beta$ cells | Ucn3 low $\beta$ cells | mature $\beta$ cells |
|------------------------|-------------|----------------|------------------------|------------------------|----------------------|
| $\alpha$ cells         | 345         |                | 0.2813                 | 0.2683                 | 0.6566               |
| immature $\beta$ cells | 38          | >0.9999        |                        | 0.1887                 | 0.6305               |
| Ucn3 low $\beta$ cells | 29          | 0.1978         | >0.9999                |                        | 0.5241               |
| mature $\beta$ cells   | 1621        | <0.0001        | <0.0001                | <0.0001                |                      |

Figure S1E: Normalized cumulative distribution of indicated populations at 9 weeks

|                        | cell number | $\alpha$ cells | immature $\beta$ cells | Ucn3 low $\beta$ cells | mature $\beta$ cells |
|------------------------|-------------|----------------|------------------------|------------------------|----------------------|
| $\alpha$ cells         | 453         |                | 0.3755                 | 0.4699                 | 0.603                |
| immature $\beta$ cells | 35          | 0.0925         |                        | 0.2231                 | 0.5231               |
| Ucn3 low $\beta$ cells | 52          | <0.0001        | >0.9999                |                        | 0.3484               |
| mature $\beta$ cells   | 1823        | <0.0001        | <0.0001                | 0.0001                 |                      |

Figure S1F: Normalized cumulative distribution of indicated populations at 3 months

|                        | cell number | $\alpha$ cells | immature $\beta$ cells | Ucn3 low $\beta$ cells | mature $\beta$ cells |
|------------------------|-------------|----------------|------------------------|------------------------|----------------------|
| $\alpha$ cells         | 414         |                | 0.3485                 | 0.2715                 | 0.6594               |
| immature $\beta$ cells | 38          | >0.9999        |                        | 0.1532                 | 0.5993               |
| Ucn3 low $\beta$ cells | 45          | 0.0944         | >0.9999                |                        | 0.4767               |
| mature $\beta$ cells   | 1960        | <0.0001        | <0.0001                | <0.0001                |                      |

Figure S1G: Normalized cumulative distribution of indicated populations at 8 months

|                        | cell number | $\alpha$ cells | immature $\beta$ cells | Ucn3 low $\beta$ cells | mature $\beta$ cells |
|------------------------|-------------|----------------|------------------------|------------------------|----------------------|
| alpha                  | 321         |                | 0.2517                 | 0.2902                 | 0.7151               |
| immature $\beta$ cells | 118         | 0.271          |                        | 0.092                  | 0.6004               |
| hilo                   | 125         | 0.046          | >0.9999                |                        | 0.5752               |
| double                 | 3924        | <0.0001        | <0.0001                | <0.0001                |                      |

Figure S1H: Normalized cumulative distribution of indicated populations at 14 months

|                        | cell number | $\alpha$ cells | immature $\beta$ cells | Ucn3 low $\beta$ cells | mature $\beta$ cells |
|------------------------|-------------|----------------|------------------------|------------------------|----------------------|
| $\alpha$ cells         | 372         |                | 0.2668                 | 0.4116                 | 0.6106               |
| immature $\beta$ cells | 19          | >0.9999        |                        | 0.3977                 | 0.6885               |
| Ucn3 low $\beta$ cells | 27          | 0.7253         | >0.9999                |                        | 0.6249               |
| mature $\beta$ cells   | 2511        | <0.0001        | <0.0001                | <0.0001                |                      |

**Table S1B: Statistical comparison of distributions of Ucn3-negative immature beta cells with Glut2, G6pc2 or Ero11b. Related to Figures 3 and 4.**

**Differences in distribution**

lower left = approximate p-value from Kruskal-Wallis test  
 upper right = Kolmogorov-Smirnov D statistic (= largest vertical difference between two distributions)

**Figure 3F: Distribution of G6pc2-negative beta cells at the periphery of the islet**

|                              | cell number | insulin+G6pc2          |                 |                      |                   |
|------------------------------|-------------|------------------------|-----------------|----------------------|-------------------|
|                              |             | insulin+ $\beta$ cells | + $\beta$ cells | mature $\beta$ cells | all $\beta$ cells |
| insulin+ $\beta$ cells       | 12          |                        | 0.4167          | 0.6695               | 0.6582            |
| insulin+G6pc2+ $\beta$ cells | 51          | 0.1846                 |                 | 0.377                | 0.3658            |
| mature $\beta$ cells         | 2266        | <0.0001                | <0.0001         |                      | 0.0112            |
| all $\beta$ cells            | 2329        | <0.0001                | <0.0001         | >0.9999              |                   |

**Figure 3I: Distribution of Ero11b-negative beta cells at the periphery of the islet**

|                               | cell number | insulin+               |                     | insulin+ Ero11b+ $\beta$ cells | mature $\beta$ cells | all $\beta$ cells |
|-------------------------------|-------------|------------------------|---------------------|--------------------------------|----------------------|-------------------|
|                               |             | insulin+ $\beta$ cells | Ucn3+ $\beta$ cells |                                |                      |                   |
| insulin+ $\beta$ cells        | 31          |                        | 0.301               | 0.2977                         | 0.5019               | 0.472             |
| insulin+Ucn3+ $\beta$ cells   | 21          | >0.9999                |                     | 0.3142                         | 0.2934               | 0.2617            |
| insulin+Ero11b+ $\beta$ cells | 100         | >0.9999                | >0.9999             |                                | 0.5163               | 0.4847            |
| mature $\beta$ cells          | 1921        | <0.0001                | 0.1807              | <0.0001                        |                      | 0.0325            |
| all $\beta$ cells             | 2073        | 0.0002                 | 0.3365              | <0.0001                        | 0.5645               |                   |

**Figure 4B: Distribution of Glut2-negative beta cells at the periphery of the islet**

|                              | cell number | insulin+Ucn3+          |               | insulin+Glut2+ $\beta$ cells | mature $\beta$ cells | all $\beta$ cells |
|------------------------------|-------------|------------------------|---------------|------------------------------|----------------------|-------------------|
|                              |             | insulin+ $\beta$ cells | $\beta$ cells |                              |                      |                   |
| insulin+ $\beta$ cells       | 179         |                        | 0.2193        | 0.412                        | 0.7105               | 0.6563            |
| insulin+Ucn3+ $\beta$ cells  | 408         | >0.9999                |               | 0.3817                       | 0.6602               | 0.6008            |
| insulin+Glut2+ $\beta$ cells | 31          | 0.1554                 | 0.5969        |                              | 0.5384               | 0.4835            |
| mature $\beta$ cells         | 6165        | <0.0001                | <0.0001       | <0.0001                      |                      | 0.0594            |
| all $\beta$ cells            | 6783        | <0.0001                | <0.0001       | <0.0001                      | <0.0001              |                   |

**Table S1C: Statistical comparison of distributions of beta cells with an alpha cell lineage label to conventional alpha and beta cells. Related to Figure 6.**

**Differences in distribution**

lower left = approximate p-value from Kruskal-Wallis test  
 upper right = Kolmogorov-Smirnov D statistic (= largest vertical difference between two distributions)

**Figure 6C: Observed distribution of alpha lineage-labeled beta cells**

|                           | number | alpha cells | labelled beta | mature beta | total cells |
|---------------------------|--------|-------------|---------------|-------------|-------------|
| alpha cells               | 413    |             | 0.3041        | 0.6348      | 0.5534      |
| lineage-labelled beta cel | 38     | 0.2084      |               | 0.5022      | 0.4222      |
| mature beta               | 2996   | <0.0001     | <0.0001       |             | 0.0814      |
| total cells               | 3459   | <0.0001     | <0.0001       | <0.0001     |             |
